# Supplementary material for: Information loss in palaeoecological data from process and observer error
Source: Copernicus journal article supplement (doi:10.5194/egusphere-2024-3845), 2025-03-14
Supplement: Supplementary file [file egusphere-2024-3845-AC1-supplement.pdf]

Dear reviewer 1,

Thank you for your time and effort in reviewing our manuscript. We have found your comments useful and constructive and have addressed each one individually below. We believe the manuscript is much improved as a result.

Kindest regards.

## **Referee 1:**

### **General comment**

Asena et al. used a virtual ecology approach to assess the sources of uncertainty on inferences drawn from palaeoecological data. Especially, they focused on the environmental (e.g., mixing, preservation, catchment erosion) and observer (core compression, sub-sampling, counting...) uncertainties to better understand which of them have the strongest influence on statistical methods applied to the data. They generated synthetic 'error-free' core-type samples of pseudoproxies, on which environmental and observational processes are systematically introduced to impose uncertainties on the simulated pseudoproxies. The influence of three sources of uncertainty (core mixing, sub-sampling, and proxy quantification from sub-samples), were assessed for their individual and combined effects on two statistical methods: Fisher Information and principal curves. Increasing sub-sampling intervals has the most substantial influence on the two statistical methods applied to the pseudoproxy data. Asena et al. also showed that Fisher Information and principal curves are not affected in the same way by introducing uncertainty. Asena et al. concluded that principal curves method more relevant to analyze a network of core data over a large geographic region, where the observer is interested in the spatial consistency of the system's trajectory but does not have the resources to extract highly resolved data from each core. In contrast, Fisher Information is useful for short-term change in a single core.

The objectives and the method of this study correspond to the scope of CP. However, the introduction and the method need to be reshaped in order to be more easily understandable by readers with different background (data, modeling, proxy, etc...). I have also some questions on the method and how it can be useful for the researchers producing the data. For this reason, I recommend major revisions before publication to CP.

### **Major comments**

1. The method section is difficult to follow for readers not in the field of pseudoproxy experiments. I know it can be quite technical, but the authors should make some efforts to simplify the language and make some schematic figures helping in the understanding of the method. The figure 1 does not bring so much for example. For example, the terms driver, archive, sensor, and observer and the links between should be explained and summarized in a figure. The authors should explain clearly what are features. A figure or more concrete examples for the beginning

of sections 2.1 and 2.2 would help too. For the moment, these parts are hard to follow during the first reading.

We agree that the description of the methods can be made more accessible. The methods are highly technical and we have adopted the suggestion to clarify the process using figures, and we adjusted the text throughout. The methods section has been substantially edited, and two new figures (now, figures 1 and 2) have been included to address the above comment.

2. About clarification, maybe it would not be a bad idea to remind what are palaeoecological data (pollen, fossils, etc...).

We have included clarification on the types of proxy we consider in this paper at the end of the introduction (lines 68-70).

3. At lines 150-152, the authors explain their analyses is for scenario 1 (Table S1), which means an abrupt environment driver switching between two constant conditions and randomly changing driver. Why did the authors focus on this scenario and not on the other ones? Is it the most frequent one in the past? Moreover, to help the reader to understand, I would give some concrete real examples of such scenario.

We have included lines 205-209 to include real-world examples of abrupt shifts in driver conditions, and why we present this scenario in the main text.

4. At line 129, the authors wrote they followed the proxy system model framework of Evans et al. (2013). The problem of proxy system models in climatology is that they often give less good results than simpler linear models. Does it apply for this study? Moreover, in the conclusion, the authors wrote “A better understanding of the proxy system models of different proxies (i.e., how different proxies record environmental signals in an archive) and the uncertainties around quantifying and analysing proxy data can bring us closer to understanding long-term climate and ecosystem dynamics.”. Finally, the authors did not analyze the (potentially huge) uncertainties related to proxy system models (water isotopes measured in speleothems). Does it apply for palaeoecological data? Finally, only some observer and environmental sources of uncertainty are analysed here (to investigate all of them is very difficult I suppose). This is also related to the sentence at line 353.

Thank you for this point. We have now made the distinction in-text between the conceptual framework of proxy system models (i.e., describing the process by which a signal is recorded in an archive) vs a formal proxy system model (i.e., the mechanistic or process-based models intended to directly model a specific process). We use the conceptual framework of a PSM; however, we have not attempted to develop a process-based model, such as PRYSM or MEPSM (among many more!), parameterized to recreate specific system or develop predictions. The reviewer is quite right that there are modelling uncertainties associated with process-based PSMs; however, these do not impact our approach in the same way. We have edited the sentence “A better understanding of the proxy system models...” to clarify that we mean a better understanding of the process by which a proxy records an environmental signal.

5. Section 3.3: It is not completely clear to me if the effects of 3 combined sources of uncertainty bring more information compared to the effects of two combined sources (from the figure 3 I can guess how will be figures 4 and 5). The authors should clarify why.

Lines 458-462 in section 4.2 in the discussion address this point by directly discussing the effect of mixing combined with other uncertainties.

6. In section 4.3, I would like the authors to give more concrete examples of how their tool can be used in relation to past palaeoecological data studies, if possible.

We have included 532-542 in the discussion to more explicitly discuss the potentials and limitations of our approach, and what it means for empirical palaeoecology.

### Specific comments

1. Supplementary figures and tables are not referenced adequately (for example supplementary table 2 instead of Table S1 or S2). Please check.

Checked and corrected throughout.

2. Lines 18-19: "influence" word two times in the sentence.

Edited the sentence.

3. Line 60: type-I error rates. Maybe quite technical for the introduction.

Described 'type-1 error' in parentheses (now, line 81).

4. Line 218: "among treatment levels, feature analysis..."

Corrected.

5. Line 221: explain what are features, it is not very clear.

Methods section has been edited to improve understandability. The above suggesting is now included in section 2.4 of the methods with a clearer description of feature analysis and its application.

6. Line 233: give example of regime shifts.

Included line 289 to include an example.

7. Line 238: define the ecological gradient.

Rephrased to reduce use of jargon.

8. Lines 240-242: this sentence is very difficult to understand.

Rephrased to better describe principal curves (now lines 298-301).

9. Line 266: define what is a treatment level.

This is now clarified on line 271 in section 2.3, at the first instance of use.

10. Figure 4: say this is for FI features.

Done.

11. Figure 5: say this is for PrC features. Also, in the legend, you can simply say this is the same as Figure 4 but for PrC features.

Adjusted accordingly.

12. Lines 381-382: A word is missing at the beginning of the sentence I think.

Corrected sentence.

13. Lines 484-485: Maybe more perspectives considering proxy system models of different proxies?
